# Supplementary material
Source: HighWire-hosted journal article supplement (https://ard.bmj.com/content/77/5/770)
Supplement: inline-supplementary-material-2 [file inline-supplementary-material-2.docx]

Supplementary Table S1 Primers and sequences used in this study

| Primers | | |
| --- | --- | --- |
| pre-miR-200c | F | ACAAGCTTAGGAAGTGTCCCCAGGGACTCG |
|  | R | AACTCGAGACGCTCTCAGCTCAAGACGAGG |
| miR-200c | F | GCGTAATACTGCCGGGTAAT |
|  | Stem loop | GTTGGCTCTGGTGCAGGGTCCGAGGTATTCGCACCAGAGCCAACTCCATC |
| U-6 | F | CTCGCTTCGGCAGCACA |
|  | R | GCGAGCACAGAATTAATACGAC |
| circVMA21 | F | TGTTAAGTGATGCTTTTCTAAC |
|  | R | AAAAATAGCTGTCCCTATTGGA |
| VMA21 mRNA | F | AGACGCTCCTGTTCTTCACA |
|  | R | GGCGACCACTGCAACAATAG |
| XIAP pre-mRNA | F | CACGCCCGGCTAATTTTGTA |
|  | R | CATGCACCTGTAATCCCAGC |
| GADPH | F | AGCCACATCGCTCAGACAC |
|  | R | GCCCAATACGACCAAATCC |
| XIAP 3’UTR | F | AGCTTTGTTTAAACTGGTGCCAATGTGAAATGTAAA |
|  | R | TCCTAGTCTAGATCTCAACATGGAAAGCTGTCAC |
| CircVMA21 |  |  |
| Site 1 | F | AGCTTTGTTTAAACAGTCAGTCTTAAGGAGTCACGT |
|  | R | CCGCTCGAGACTCAAAAGCAACCGTAAGTCA |
| Site 2 | F | AGCTTTGTTTAAACGGCTTCAATTAAAAGGTTCGAGG |
|  | R | CCGCTCGAGTCCATCAGATATGCCCAAGGA |
| Site 3 | F | AGCTTTGTTTAAACTCCTTGGGCATATCTGATGGA |
|  | R | CCGCTCGAGGTCAGGAAAAGCTGGCAGAA |
| Site 4 | F | AGCTTTGTTTAAACTGAGTCTAGGGTAGTATGTGGT |
|  | R | CCGCTCGAGAGCATAAGATCCCAAAAGCACA |
| Site 5 | F | AGCTTTGTTTAAACCTTGTGCTTTTGGGATCTTATGC |
|  | R | CCGCTCGAGAAGCCTAAATATCAACCCTAGCA |
| Site 6 | F | AGCTTTGTTTAAACGCACAGCACCTTACAGTTTG |
|  | R | CCGCTCGAGGCAGCACATCCAAATCCTCC |
| circVMA21 vector | F | GTAACTATAACGGTCGGAAGAGAGAATGAAGTCCCCT |
|  | R | ATTACCTCTTTCTCCTCATGTTGATCACTGCCTGTTC |
| Linear VMA21 vector | F | GTAACTATAACGGTCTTTTCTCTTGATAGGCGCCC |
|  | R | ATTACCTCTTTCTCCAATCAGGACACAGCAAAGTAGC |
| circVMA21 mutation |  |  |
| Site 2 | F | TGGAAAACATTTTTTTTTCATCCAAAAAGCATTCTCCTTGGGCATATC |
|  | R | GATATGCCCAAGGAGAATGCTTTTTGGATGAAAAAAAAATGTTTTCCA |
| Site 3 | F | ATGTGCAATCTAAAAACACTCCCACAAGCATTTGTTTTTTAATTATAAAATCATAGTA |
|  | R | TACTATGATTTTATAATTAAAAAACAAATGCTTGTGGGAGTGTTTTTAGATTGCACAT |
| Site 4 | F | CATGGGTATTTTTCTGCAAGCATTTAAACCAGGGGCATATG |
|  | R | CATATGCCCCTGGTTTAAATGCTTGCAGAAAAATACCCATG |
| Site 5 | F | GAGTCATTGAATATGCTGTAGCCTTGAATAGTGCCCTGACTAGG |
|  | R | CCTAGTCAGGGCACTATTCAAGGCTACAGCATATTCAATGACTC |
| Site 6 | F | TTCTAGATGGTCCCTAATTAAGAAGCCTTGTTGTATTTAGAATTGTCCACCT |
|  | R | AGGTGGACAATTCTAAATACAACAAGGCTTCTTAATTAGGGACCATCTAGAA |
|  |  |  |
| siRNAs | | |
| circVMA21 si-1 |  | AAGGGCGCUAGCACUACAAACAC |
| control si-1 |  | CGCCUAUAUAGCACUACAAACAC |
| circVMA21 si-2 |  | ACAUCCCAAGGGCGCUAGCACUA |
| control si-2 |  | AGUCUCACGUCACACUAGCACUA |
| VMA21 mRNA si |  | TTATTTCGCCACTACTTGAGC |
| XIAP si |  | GAAGCUAGAUUAAAGUCCU |
| scramble si |  | AGUCAGACUGAAUGCAGUC |
|  |  |  |
| Probes for northern blot | | |
| miR-200c |  | TCCATCATTACCCGGCAGTATTA |
| U6 |  | TGGAACGCTTCACGAATTTG |
| circVMA21 | F | TGATGCTTTTCTAACCGTTTTC |
|  | T7-R | TAATACGACTCACTATAGGGAGATTAATCCTGTTTGCCTTCACG |
| 18S |  | CCAGTCAGTGTAGCGCGCG |
|  |  |  |
| Probes for FISH | | |
| Dig-miR-200c |  | TCCATCATTACCCGGCAGTATTA |
| Bio-circVMA21-1 | F | ACCGTTTTCTGGATGGATTTT |
|  | T7-R | TAATACGACTCACTATAGGGAGAATACACAAAGAGGGCCAGCA |
| Bio-circVMA21-2 | F | GGGGAGGATTTGGATGTGCT |
|  | T7-R | TAATACGACTCACTATAGGGAGAAATCCTGTTTGCCTTCACGC |
|  |  |  |
| Other sequences | | |
| Bio-circVMA21 pull-down probe |  | CATCCCAAGGGCGCTAGCACTACAAACA |
| Bio-random pull-down probe |  | TACGGATGTCTAGCGCTCTTGGGCTTTG |
| antagomir-200c |  | UCCAUCAUUACCCGGCAGUAUUA |
| antagomir-NC |  | AAACAUGAUGUGUUUUCAUGACC |
| Bio-miR-200c |  | UAAUACUGCCGGGUAAUGAUGGA |
| Bio-miR-mut |  | UUCACGGCCCGGGUAAUGAUGGA |
