# Supplementary material
Source: HighWire-hosted journal article supplement (https://ard.bmj.com/content/77/5/770)
Supplement: inline-supplementary-material-4 [file inline-supplementary-material-4.docx]

**Supplementary Table S2 CircVMA21 sequence with miR-200c binding sites** **indicated by bold letters**

GCGCCCUUGGGAUGUCCAAUAGGGACAGCUAUUUUUACGCUGCUAUUGUUGCAGUGGUCGCCGUCCAUGUGGUGCUGGCCCUCUUUGUGUAUGUGGCCUGGAAUGAAGGCUCACGACAGUGGCGUGAAGGCAAACAGGAUUAAAGUGAACAUCACCUUUUUAUAGCAUUAAAUUCAUUUUUUAAAAUGAUAAAUGCUGGAGGGGGCCAUCUGAUUUGAAUAAAGUUGAAAGAACAUGUUAAAGUCAGUCUUAAGGAGUCACGUUUGAGUAUGUAAAUUUUGAUCUUUCUAAUAUGUUGGUUUGUAUAUUCAGUUUUAACUGUAUGAAUCUGAUUUGCAAAUGAGAAUUUGGAAAAGUUAGUUACAAAGAAAUAUGUUAAUUUAAUUAGACAAUACUCUGGAAGGAAUUUUAUCU**UCUUUCAACAAAACAUGUUUUAUAGUAUUC**UGACUUACGGUUGCUUUUGAGUUUUACUCAUUUGGAUAUAUUAAGAUGCACACAGUGAAGCAAAUUAAACUCCACUUUACGCUGGAAUGCUUUCUUUAGCAUGAAAAUACCAGGUCCUUGGAUUUGGGAUUUUAAUUUCCUAUGGAAAGUUGCUUAAAUUGUGGACACUGGAAUUAAUCUGAAUGUCACUGAGGAAUUUCACAUGAAGUGUAAUCCCUAGUCAAUAAGAAUUAUCCAUUACAUUAUUUUAUGGGAAAACUAGGCUAAAUUACAUCCAUUCAGGUAAAAGGACCUUAGCUUACUGAAGGAUCUAAAGAGCAAAGCAAAGAUCUCACUACUCAAACACUCAGCCUGCUUCCUUCAAGUCCCCUUGCAGGCCAGCUUUGUGCUUUGCAGACCAACUUUUUAAUGAGAUACUUUGCUUCCUCAUUCAACAUUGAAGCUAGGCUUCAAUUAAAAGGUUCGAGGAAGCUCCAUUUAAAAUUGUUUUUUUUACUAUUUUUUAAAAUUGUAGUGUAUAUGAUAGGAAUUUGCAUUUAAAUAUGUUCAUUUUUGCAUAUGUUAGGAGUGGAAACAAUCUGGAAAACAUUUU**UUUUUCAUCCAAAAAGUAUUC**UCCUUGGGCAUAUCUGAUGGAAAAAAACCUUGAUUUUAUUUUCGUAUCUUUAGUCUGUGUUCUUUCUAGUUAUUUGGUACUAAUUAUGUGCAA**UCUAAAAACACUCCCACAAGUAUUU**GUUUUUUAAUUAUAAAAUCAUAGUAUAUGUUCUUUGUAGAAAACUGGAAAAAUACAUAUUCAAACAGGAAAAAAAAUCAAAAUUCCCCAUAAUGUUGCCAUCUAAAAAUAACCUCUAUUUUAGUUGAUAUCCCGUAUUCAUUUUUGAAAGCCAUUCCUUAAUGCUAGUUUGAUACACACUAAAAGUUUAGCUUACAAGUUCAAAUUCUGCCAGCUUUUCCUGACAGCUAUUUGCAUUUUUUUCAGAUGAGUGAUUAUUGGCCAUUUUCUUUUUCUUUUUCUUUAUUUUAUUUAUUUAUUUUUUUGAGACAGAGUUUUGCUCUGUUGCCCAGGCUGGAGUGCAGUGGUGCAAUCUCGGCUCACUGCAACCUCUGCCUCCUGGGUUCAAGUGAUUCUCCACCUCAGCCUCCCAAGUAGCUGGGACUACGGAUGCCUGCCACCACGCCUGGCUAAUUUUUUUUUGUAUUUUUUUGUAGAGACGGGGUUUCACCAUGUUGUCCAGGCUAAUCUUGAACUUGUGACCUCAGGUGAUCCACCCGCCUCGGCCUCCGAAAGUGCUGGGAUUACAGGCGUGAGCUACCACGCCCGGCCUUAUUGACCAUUUUCUAAAUAAGCACAUUCUAUCUUUAUUCUCUUAAAAUUCAAAUUUUCUGUUACUGAUAAUCCUAAUACUAGGAUUCUUGCUUAAGUAUGUGAAACCAUUACCGAUUUGUUGUUCACAUUUAUUUUUUAUGUUGUGAAACUGGACUAAAGGAAUAGAGGGAUGAUUAGUCAUAAAAGUCAAAUAGCAUUUGUGUUUAACUGUUGAGAAAAGUGAAAGAUCAGUAUGAUUAUUAUGGAACUGUUUUUAAUUCUUGCUUAAAGACUACAAUUUUAGUAUAAUGACAUUUGAGUCUAGGGUAGUAUGUGGUAGAUUUCUAGAUGG**UCCCUAAUUAAGAAGUAUUG**UUGUAUUUAGAAUUGUCCACCUAAUUUCUUUUUAUAUAAUGCCAAGGUAUUUCUUGUGCUUUUGGGAUCUUAUGCUGUUUGUAAAAUGUUACUGUCCAAUGUUGGAUUAUUGUUUUGGUUUCAGGCAUUUGCUGAAUAGGUGAUGAUA**CAUGGGUAUUUUUCUGCAAGUAUUU**AAACCAGGGGCAUAUGCAAAGGCAGUUGUAAUUUCCUCUUGGAAAAAGCGCCAAAUGUUUGAAGGUUAAAAUCAAAUGCUAGGGUUGAUAUUUAGGCUUAUAACAAAAUAGGCUUGUUUUCAAAGCAGUUUUUUCCUAGAGUUUUAACUGUUAACUCACUAGUUUGCUGCUGUUUUUAACUAUGUUAAAUAACAUAUGGUAUUUGGCAAAUAGAUUUAUUUUUCAAAAUGUCUCACUAGUUUCCUUUUACACAAUGUAUAUACUUCAAGAUGUAUAGAAAGGAAAGCUACAGUUGAGCCCUUAUACAUGUUUUAAGGUAGAAAUAUGUUCCCUAUUGUUUGAAAACUGAUUGUAAGAAUAACCUCAGUUAGGAGAUAUAACUUGAAGUGUCAGUCCAAACUACUGAUUUAACCCUAUUUACGGUAACACAUUACCUUCCUCACCUCCUGUUUGGCCCUGGAGAAUGUAGUCCUUUUUCUCAUUUGUGUUGAGAAAUGAAAAGUCUGCUGUAGAAUGUAUCUGAUGUCAUUAGUUCUUCAAAUGGAUACCAUUGUACAUAUAACAGUAGAAUUUGGUUUGGGGUUGUUAGUGAAAAAAAAUUUAAACCUGCCAUUAAAAAUCCCCAUGUUUCAUGGAAAUCUAACAGAAAUACAUUGUAAUAAUUAGAACAUUUUGUUUUCUUUUUUCUUUUUUUUUUUUUCGAGACGGAGUUUUGCCCUUCUUGCCCAGGCUGGAGUGCAAGGGCGCAAUCUCGGCUCGCUGCAACCUCCGCCUCCCGGGUUCAAGCAGUUCUCCUGCCUCAGCCCCCUGAGUACCUCAGAUGACAGGUGCGUGCCACCACACCCGGCUAAUUUUUGUAUUUUUAGUAGAGACGGGGUUUCACCAUGUUAGCCAGGCUAGUCUCGAACUCCUGACCUCAGGUGAUCCACCCGCCUCCGCCUCCCAAAGUGCUGGGAUUACAGGUAUCAGCCACCGUGCCUGGCCUAAUAAUUGGAACAUUUUCAUCAUGAAAAUGUCAUCAGCUUUGCCAAAAGAAACAACCAAUUGACUUGUUUGGCGUUUGUUUUCCAUUUUCAUGUCAAUUUUAUGUAUACAGUUAGAAUACCCAAGGAGACCACUAAAAUCAGUUAAACAAGUAGGGUAUAUACAAAGAAAGAUGAAACCCGAAAGUACAUAAAAAGGAUUUAAAUCCGAUUUUAGAUGUACCUAGUGUGUAUUUCUUAUCUCUAGACAAGUUCAUGUUUAUUGUUUAAUUUAUGCCCAAGUGAAGUUGUAAACUUAUGGUUCAACUCUGACACAGAAUUUGUCACUUGUCUGAGGUCAGUGGCAGGUUUCUCUGCUGUCAAGCACUCUGUGUCACCCACCAGAUUAGUAUAACUAUUAAUUCAGACUGUACUCCUAUGUUUAAGAUAAUUUUUACAAGAGCUGGCUGAAGCAGCACAUUAGUAACCUGACAAGAUUUCUUUUUCCCUUUUCAGGGGGAAAGGGUCACCUUAAAAAUAAAUUAUUUUCAGGGACUUUGGGAAUCUAAUGAUAAAUAUUACACAUAAUCUAUGAAUAGCUUAAUCCUUUAUAUAUUCCUUAAAAUAGGAAUUCCUCGACAUCACUCCUGGCCACACUUUCCUUGCCUGUGUUGUUGCUAUGUGUAUUUGAAAGUAAUAUCUGCAUUCCUUUUAAGAUGUUCUGUAAGUCAUAUUUGUCAGUUAUACAGAGUAGUCUUCCUUUUCCCCACGUUCAGUGUAAUCUCACUGAACAGUAAUAAUAGCAAUAGCUAACAACAUCUGCACAGCACCUUACAGUUUGCAAAGAACGUUCACACAUUCUCAUUUGAGUUUUGCAUAGUGAACCUGUUACGAGAUGUCUCUUGACGUCGAUGCUAAAAGUGUUAGAAUCUUUACAUCACUAGA**GUCAUUGAAUAUGCUGUAGUAUUG**AAUAGUGCCCUGACUAGGGGGAGGAUUUGGAUGUGCUGCAUUUCAAGCCGUGUAUAAUCAUCAAAAUGGGGGGCUUGAGUUCUUUAGCUACUUGAAUCCGAUUUACUUCUGUUAAGUGAUGCUUUUCUAACCGUUUUCUGGAUGGAUUUUGUAUUCACUAUAUUGUAGCUUGUAAUUUGUAUAAAUGUACCAUCUGAUGUCAUUAAAAAAAGUGUUUGUAGUGCUA
