# Supplementary material
Source: HighWire-hosted journal article supplement (https://ard.bmj.com/content/77/5/770)
Supplement: inline-supplementary-material-7 [file inline-supplementary-material-7.docx]

**Supplementary Table S4 Binding sites of Ago2 protein in circVMA21**

| Circular RNA | Tag Name | % Identity | Alignment Length | Mismatches | Gap Openings | Tag Start | Tag End | Circular RNA Start | Circular RNA ENd |
| --- | --- | --- | --- | --- | --- | --- | --- | --- | --- |
| hsa_circ_0091702 | HPSEF_24049_G29182.1_150573551_46 | 100 | 46 | 0 | 0 | 1 | 46 | 138 | 183 |
| hsa_circ_0091702 | HPSLC_20813_G24865.1_150573551_51 | 100 | 51 | 0 | 0 | 1 | 51 | 138 | 188 |
| hsa_circ_0091702 | HPCB1_43214_G55383.1_150573551_36 | 100 | 36 | 0 | 0 | 1 | 36 | 147 | 182 |
| hsa_circ_0091702 | HPSLB_7903_G9686.1_150573551_40 | 100 | 40 | 0 | 0 | 1 | 40 | 147 | 186 |
| hsa_circ_0091702 | HPCB3_25062_G34522.1_150573551_41 | 100 | 41 | 0 | 0 | 1 | 41 | 147 | 187 |
| hsa_circ_0091702 | HHFKP_155668_cluster-24110_1_140_38 | 100 | 38 | 0 | 0 | 1 | 38 | 484 | 521 |
| hsa_circ_0091702 | HPKTA_64287_G69577.1_150573902_29 | 100 | 29 | 0 | 0 | 1 | 29 | 504 | 532 |
| hsa_circ_0091702 | HHFCT_169164_cluster-24110_2_171_24 | 100 | 24 | 0 | 0 | 1 | 24 | 552 | 575 |
| hsa_circ_0091702 | HPSLC_20816_G24868.1_150574077_23 | 100 | 23 | 0 | 0 | 1 | 23 | 672 | 694 |
| hsa_circ_0091702 | HHFKP_155669_cluster-24110_2_374_40 | 100 | 40 | 0 | 0 | 1 | 40 | 786 | 825 |
| hsa_circ_0091702 | HPRT3_27040_G36281.1_150574532_43 | 100 | 43 | 0 | 0 | 1 | 43 | 1126 | 1168 |
| hsa_circ_0091702 | HHFKP_155670_cluster-24110_3_133_41 | 100 | 41 | 0 | 0 | 1 | 41 | 1128 | 1168 |
| hsa_circ_0091702 | HPSLB_7904_G9687.1_150574532_32 | 100 | 32 | 0 | 0 | 1 | 32 | 1134 | 1165 |
| hsa_circ_0091702 | HPTK7_8166_G12315.1_150574532_33 | 100 | 33 | 0 | 0 | 1 | 33 | 1134 | 1166 |
| hsa_circ_0091702 | HPTK1_31020_G37240.1_150574532_34 | 100 | 34 | 0 | 0 | 1 | 34 | 1134 | 1167 |
| hsa_circ_0091702 | HPCB1_43217_G55386.1_150574532_35 | 100 | 35 | 0 | 0 | 1 | 35 | 1134 | 1168 |
| hsa_circ_0091702 | HHFCT_169166_cluster-24110_5_535_40 | 100 | 40 | 0 | 0 | 1 | 40 | 1298 | 1337 |
| hsa_circ_0091702 | HPRT3_27041_G36282.1_150575174_30 | 100 | 30 | 0 | 0 | 1 | 30 | 1771 | 1800 |
| hsa_circ_0091702 | HPKTA_64293_G69583.1_150575174_39 | 100 | 39 | 0 | 0 | 1 | 39 | 1771 | 1809 |
| hsa_circ_0091702 | HHFKP_155671_cluster-24110_4_124_41 | 100 | 41 | 0 | 0 | 1 | 41 | 1811 | 1851 |
| hsa_circ_0091702 | HHFKP_155672_cluster-24110_6_315_41 | 100 | 41 | 0 | 0 | 1 | 41 | 1861 | 1901 |
| hsa_circ_0091702 | HHFKP_155673_cluster-24110_7_190_38 | 100 | 38 | 0 | 0 | 1 | 38 | 2085 | 2122 |
| hsa_circ_0091702 | HPCB3_25065_G34525.1_150575553_32 | 100 | 32 | 0 | 0 | 1 | 32 | 2135 | 2166 |
| hsa_circ_0091702 | HHRBL_15714_BCBL1-2of3-SCL_1749_101 | 100 | 101 | 0 | 0 | 1 | 101 | 2163 | 2263 |
| hsa_circ_0091702 | HHFKP_155674_cluster-24110_8_354_62 | 100 | 62 | 0 | 0 | 1 | 62 | 2204 | 2265 |
| hsa_circ_0091702 | HPRT3_27043_G36285.1_150575688_27 | 100 | 27 | 0 | 0 | 1 | 27 | 2287 | 2313 |
| hsa_circ_0091702 | HPTK1_31023_G37243.1_150575698_24 | 100 | 24 | 0 | 0 | 1 | 24 | 2288 | 2311 |
| hsa_circ_0091702 | HPKTA_64294_G69585.1_150575700_26 | 100 | 26 | 0 | 0 | 1 | 26 | 2288 | 2313 |
| hsa_circ_0091702 | HPKMA_15442_G17845.1_150575843_28 | 100 | 28 | 0 | 0 | 1 | 28 | 2438 | 2465 |
| hsa_circ_0091702 | HPKMB_8381_G9611.1_150575842_24 | 100 | 24 | 0 | 0 | 1 | 24 | 2442 | 2465 |
| hsa_circ_0091702 | HHFKP_155676_cluster-24110_10_291_41 | 100 | 41 | 0 | 0 | 1 | 41 | 2452 | 2492 |
| hsa_circ_0091702 | HPKTA_64296_G69587.1_150575881_30 | 100 | 30 | 0 | 0 | 1 | 30 | 2476 | 2505 |
| hsa_circ_0091702 | HPKTA_64297_G69588.1_150575908_27 | 100 | 27 | 0 | 0 | 1 | 27 | 2505 | 2531 |
| hsa_circ_0091702 | HHFKP_155677_cluster-24110_11_73_27 | 100 | 27 | 0 | 0 | 1 | 27 | 2519 | 2545 |
| hsa_circ_0091702 | HHFCT_169172_cluster-24110_11_199_46 | 100 | 46 | 0 | 0 | 1 | 46 | 2524 | 2569 |
| hsa_circ_0091702 | HPKTA_64298_G69588.2_150575933_30 | 100 | 30 | 0 | 0 | 1 | 30 | 2532 | 2561 |
| hsa_circ_0091702 | HHRBL_15715_BCBL1-2of3-SCL_92_164 | 100 | 164 | 0 | 0 | 1 | 164 | 2561 | 2724 |
| hsa_circ_0091702 | HHRBC_14128_BC3-2of3-SCL_267_88 | 100 | 88 | 0 | 0 | 1 | 88 | 2597 | 2684 |
| hsa_circ_0091702 | HHFCT_169173_cluster-24110_12_157_41 | 100 | 41 | 0 | 0 | 1 | 41 | 2626 | 2666 |
| hsa_circ_0091702 | HPSD3_10725_G14583.1_150576095_32 | 100 | 32 | 0 | 0 | 1 | 32 | 2697 | 2728 |
| hsa_circ_0091702 | HPRT3_27044_G36286.1_150576119_27 | 100 | 27 | 0 | 0 | 1 | 27 | 2715 | 2741 |
| hsa_circ_0091702 | HPCB1_43220_G55389.1_150576104_26 | 100 | 26 | 0 | 0 | 1 | 26 | 2716 | 2741 |
| hsa_circ_0091702 | HPCB1_43221_G55390.1_150576831_26 | 100 | 26 | 0 | 0 | 1 | 26 | 3419 | 3444 |
| hsa_circ_0091702 | HHFKP_155678_cluster-24110_12_181_41 | 100 | 41 | 0 | 0 | 1 | 41 | 3515 | 3555 |
| hsa_circ_0091702 | HHFKP_155679_cluster-24110_13_240_41 | 100 | 41 | 0 | 0 | 1 | 41 | 3595 | 3635 |
| hsa_circ_0091702 | HPKTA_64300_G69590.1_150577066_31 | 100 | 31 | 0 | 0 | 1 | 31 | 3664 | 3694 |
| hsa_circ_0091702 | HPTK1_31026_G37245.1_150577075_24 | 100 | 24 | 0 | 0 | 1 | 24 | 3665 | 3688 |
| hsa_circ_0091702 | HPCB1_43222_G55391.1_150577229_29 | 100 | 29 | 0 | 0 | 1 | 29 | 3825 | 3853 |
| hsa_circ_0091702 | HHFKP_155681_cluster-24110_15_225_41 | 100 | 41 | 0 | 0 | 1 | 41 | 3864 | 3904 |
| hsa_circ_0091702 | HHFCT_169174_cluster-24110_13_59_58 | 100 | 58 | 0 | 0 | 1 | 58 | 3874 | 3931 |
| hsa_circ_0091702 | HPCB1_43223_G55392.1_150577297_28 | 100 | 28 | 0 | 0 | 1 | 28 | 3892 | 3919 |
| hsa_circ_0091702 | HHFKP_155682_cluster-24110_16_150_41 | 100 | 41 | 0 | 0 | 1 | 41 | 3909 | 3949 |
| hsa_circ_0091702 | HHFCT_169175_cluster-24110_14_740_130 | 100 | 130 | 0 | 0 | 1 | 130 | 3985 | 4114 |
| hsa_circ_0091702 | HPKMA_15443_G17846.1_150577405_24 | 100 | 24 | 0 | 0 | 1 | 24 | 3995 | 4018 |
| hsa_circ_0091702 | HPRT3_27045_G36287.1_150577392_25 | 100 | 25 | 0 | 0 | 1 | 25 | 3995 | 4019 |
| hsa_circ_0091702 | HHFKP_155683_cluster-24110_17_2249_111 | 100 | 111 | 0 | 0 | 1 | 111 | 3996 | 4106 |
| hsa_circ_0091702 | HPKTA_64301_G69591.1_150577450_60 | 100 | 60 | 0 | 0 | 1 | 60 | 4032 | 4091 |
| hsa_circ_0091702 | HPKMA_15444_G17847.1_150577439_61 | 100 | 61 | 0 | 0 | 1 | 61 | 4034 | 4094 |
| hsa_circ_0091702 | HPRT3_27046_G36289.1_150577480_31 | 100 | 31 | 0 | 0 | 1 | 31 | 4063 | 4093 |
| hsa_circ_0091702 | HHFCT_169177_cluster-24110_17_187_143 | 100 | 143 | 0 | 0 | 1 | 143 | 4143 | 4285 |
| hsa_circ_0091702 | HHRBL_15716_BCBL1-2of3-SCL_1540_132 | 100 | 132 | 0 | 0 | 1 | 132 | 4176 | 4307 |
| hsa_circ_0091702 | HHFKP_155684_cluster-24110_18_834_81 | 100 | 81 | 0 | 0 | 1 | 81 | 4177 | 4257 |
| hsa_circ_0091702 | HPKMA_15445_G17848.1_150577642_31 | 100 | 31 | 0 | 0 | 1 | 31 | 4235 | 4265 |
| hsa_circ_0091702 | HPKTA_64302_G69592.1_150577642_31 | 100 | 31 | 0 | 0 | 1 | 31 | 4240 | 4270 |
| hsa_circ_0091702 | HHFCT_169178_cluster-24110_18_43_50 | 100 | 50 | 0 | 0 | 1 | 50 | 4307 | 4356 |
| hsa_circ_0091702 | HHRBL_15717_BCBL1-2of3-SCL_5004_84 | 100 | 84 | 0 | 0 | 1 | 84 | 4317 | 4400 |
| hsa_circ_0091702 | HHFKP_155685_cluster-24110_19_113_28 | 100 | 28 | 0 | 0 | 1 | 28 | 4319 | 4346 |
| hsa_circ_0091702 | HPTK1_31029_G37248.1_150577729_33 | 100 | 33 | 0 | 0 | 1 | 33 | 4323 | 4355 |
| hsa_circ_0091702 | HHFCT_169179_cluster-24110_20_78_43 | 100 | 43 | 0 | 0 | 1 | 43 | 4389 | 4431 |
