# Supplementary material
Source: HighWire-hosted journal article supplement (https://ard.bmj.com/content/77/5/770)
Supplement: inline-supplementary-material-8 [file inline-supplementary-material-8.docx]

**Supplementary Table S5 The fragments in the 3’ UTR of VMA21 mRNA shown in Ago2 CLIP-sequence**

|  | Star | End |
| --- | --- | --- |
| chrX | 150573397 | 150573437 |
| chrX | 150573682 | 150573722 |
| chrX | 150573872 | 150573912 |
| chrX | 150573984 | 150574024 |
| chrX | 150574077 | 150574117 |
| chrX | 150574413 | 150574453 |
| chrX | 150574457 | 150574497 |
| chrX | 150574517 | 150574557 |
| chrX | 150575147 | 150575187 |
| chrX | 150575507 | 150575547 |
| chrX | 150575660 | 150575700 |
| chrX | 150575799 | 150575851 |
| chrX | 150575878 | 150575918 |
| chrX | 150576203 | 150576243 |
| chrX | 150576288 | 150576328 |
| chrX | 150577042 | 150577082 |
| chrX | 150577212 | 150577252 |
| chrX | 150577266 | 150577306 |
| chrX | 150577442 | 150577522 |
| chrX | 150577638 | 150577678 |
| chrX | 150577689 | 150577729 |
| chrX | 150577742 | 150577782 |
|  |  |  |
| chrX | 150573395 | 150573435 |
| chrX | 150573872 | 150573920 |
| chrX | 150573982 | 150574022 |
| chrX | 150574040 | 150574120 |
| chrX | 150574302 | 150574342 |
| chrX | 150574420 | 150574479 |
| chrX | 150574517 | 150574559 |
| chrX | 150574677 | 150574717 |
| chrX | 150574753 | 150574793 |
| chrX | 150575158 | 150575240 |
| chrX | 150575464 | 150575504 |
| chrX | 150575507 | 150575552 |
| chrX | 150575667 | 150575707 |
| chrX | 150575733 | 150575773 |
| chrX | 150575811 | 150575989 |
| chrX | 150576048 | 150576128 |
| chrX | 150576141 | 150576181 |
| chrX | 150576192 | 150576232 |
| chrX | 150576270 | 150576310 |
| chrX | 150576790 | 150576830 |
| chrX | 150576850 | 150576890 |
| chrX | 150577042 | 150577082 |
| chrX | 150577117 | 150577157 |
| chrX | 150577167 | 150577207 |
| chrX | 150577212 | 150577306 |
| chrX | 150577361 | 150577521 |
| chrX | 150577539 | 150577579 |
| chrX | 150577627 | 150577667 |
| chrX | 150577681 | 150577721 |
| chrX | 150577742 | 150577789 |
