# Supplementary material
Source: HighWire-hosted journal article supplement (https://ard.bmj.com/content/77/5/770)
Supplement: inline-supplementary-material-11 [file inline-supplementary-material-11.docx]

**Supplementary Table S6 Third exon sequence of VMA21 gene of rat**

GTGCCCTTGGAATGTCCAATAGAGACAGCTATTTTTATGCTGCAATTGTTGCTGTTGTTGCTGTTCATGTGGTTCTGGCCCTGTTTGTCTATGTGGCCTGGAATGAAGGCTCACGACAGTGGCGTGAAGGCAAACAGGATTAAAGCGAACATCACCTTTTGATAGCATGAAATTTATTTTTTGAATATGTTAAATAATTGTGGGATATTGATAATAAATACATTCATTTGAATAAAATTAAAAGAACATGGTAAAATCAAGTCTTAAAGAGTCAGTCGCATTTGGCTAAATTTTGACCCACCCAATAATATGGTTACTTTGAACTTTGAATCTCCATTTGCAAATGAAAATTTGGGAAAGTTGGATAGGTACAGATATATATGTTAAACGAGTTATTGCTTATCCTAGCAAGAATTTACATATCTTACAATAACAAAAAATTATAGTGATTCGGCTTATACTTGCTTTTCAGTTTTATTTATTTGGATATATTAAGAAATACTTAGTAAAGCAAATAATCTAAATTTCCATTTTGGGTTGGGGATTTAGCTCAGTGGTAGAGTGCTTGCCTAGCAAGCGCAAGGCCCTGGGTTCGGTCCCCAGCTCCGAAAAAAAAAAAAAAAAGAAAAGAAAAGAAAAAAAATTTCCATTTTTACTGAAGGACTTCCCTGGAAAATACGAGGCAGGCTCTTGGGTTTGAGATTCTACTTTTCCTAAAAGTTACTTACATTGTAGGCATTTTCATTAATCTGACTTTTTAGTCAGTGAGTAAAGATCGCTCTCACATTCCATTATTTTGTGGGGAAAGTCACTGAAATCACACTATTCATGCAAAAGGACTTAGGGTTACTGAGGACAGAGGACTGGGCTGACTGTCAGCATTGTATCACACTAACATTGTGCCCTCATTTTGCCTTGAAATTAGGTTTCAGTTGCAAAGGTTATCGAAATCCCATTTAATGTGTTGTCTTAGTTTAAAATGGTAAATGATAAGTTTTAGAATACCGAAATGTTCAGCATCCATCCACTGAGAGTATACAGTCTTAAACATCACAATTCGTAGGAGGGGTTCTTGAAGGTTTTTGTCTGTTAATCTTTTTTATGACAGCTAAGTTACATCCTGAGCATAGATTACATCTTAATATAATCCTTGAAGTCTTTTTTGATGAGAACAACCTTGTCCCAGAAAAAAAGCCCAGTTACCTTGGTACCTTCAGTCTATGGTCAGACAAACCACTTGATACTGTGTATATATATAAAAACACCGTCCCCCAAATATTTATTTCCAATTAAAAGAACATAATATATTCTGTAAAACACTGGAAAATACATATAAAAATTTAAGGGTAAAAATTTGCCCATAATGTTACTACTTGCAGATTATCAGTAGTGTAGTTCACAATCCCTGTACAGTTTGAATGATGTTTCTTAATGCTGGTTACATATATACTAAAACCTTGAAGTTGATCTTGTCAACTTCACCAAAGAGCTGTTTGCGGTTTTTCAGATGTGTGATAATTGCCCATTGTCTTATAAAGCATATACTATCTTTATTATTTTAACATTCCCATTTCAATGTTTTTACCATAAAGAAATATAAAAGTCTGAGGTGATAACCCAGTTTAAATACTATATAACATGCATATCTCAAAATATATGGCACTCATAAGCATGTATGCTCCTTGTTTTTAATATATCAATTAAATTGAATTGTAAAAATGAAGAAAGTTCAAACACTTGTTACTGGTAATCCTAATATAATGAATGGCCCCTACTTTAATATTTGCCATTATTGATTTGTTGGTCTGCTGTCATTTTCCTGGTGTGGAACTAGACTAGAAATAGGTGATTAGGCATAAAAATCTGTGCTTGTGTTACATTATTGTTGCAAAAAACAAGATTAACGTGATTATTAAAAGATTGTTCTTAATTCTTTAATGGTTATATGTAGTTTAAATGTATTTAAAACTGAGTATTCTAACTATGAGAGTCTTATTTTGTAAAGTCTGCAGTTTTTAGTATTATGCTATTTGAGTCTTAGACATTATGTGCTTGATTTCTAGTTAGTTTTCTTATTAGGTGGCCTATTGTATTTAGAATTGTCCACTCAGTTTCTTTTTGTGTAATGCCAAGACTTTTTTTCTTGTATTTTAGGAATATTGTACTATTTGTAAAATATACTGTTGGATTACTTTGTTTTATTTCAGACATTTGTTAATTAATGGTACAGGTCTTTTTAAAAAGTCTTTTAACCAGGGATACATGTAAACACATGTAGTTTTCTCCCTTGGGAATAAAGTATAATGTGTTTGAAAATTAAAATATTCACATTGGTGTTTAGAATGATTATAAATTTTGTTTTAAAGCCATTTTTCTAGGATTTTGACTGCTCATTTAGGAGTTTGCTGCTCTTAGCTAACATTTTTTCAAGGTTTTTATCTAGTTTCCTCTTTCACAAAATTCATATTTCATGATGTGTTCAAAGAAAAGCTCCAGCTGAACTGCTAAGTGTTTTCTGGCAGGAATATGTTCACTGATGTTCAAAACCTGATCGTAATGGTGATCTCAGTTAGGGAATATAACTTGAAGTGTGAGTGCCAGCTCCTGATTTAACCCCATTTGCTGTAACAGTACTTTCCCCATCTCCTCATTTGCCTCCTGAATAATCCTTTCTCTCAAACTAATGCTAAACTAATGGAAGTTCCTGTAGGATGTAGCTGGTACCACTGACTCTTCAAATGGATGCCATTTCACAGGTTAGGGTAGTGTTCTGGTTTACAGTGATAGTGAAGAACTGGGTATTTCATGGGAATCTAACAGTAATTAGAATAACTTGAAAGTTTACATCAGAAAAGTCATATTGAACCAGCTATGCTGGAATATGCTTGTACTTTCAGTATTTTAGGAAGCAGATGCAGGAGGATTAGGACTTCAAGGCCACCCTGGGACGTCATGAGACCCTGTCTCAAAAGAACAGCAGTAACAACAAAACCTACAAAAACAAACAATTTGGCTTTATAGAAAGAAGCAACCAATGGGCTTGTGCTTATTTTCATATAAATCTCATGTAGACAGGACATTCAAATGGGTAAATAAAAGTATACAAGTAAGACGTACCCAAGGAAGGCTGATGCTGAAGGTGTGTGAAAGAAAGGGTCCTGTTTTACGTATATCCATTGTATCTCCAGACAGTTTTGTATTTAGTGTCTAAGCATAGTAAAGCTGTAGACAGGGTTCAATGACAGGATGGTATTTGTCACTTGTCTTCAGTTAATAGCAGGTTTCTTTACTGTGTTATTCACTAGTAAAATACACAACTATTCAGATTTTGCTCCTAAATTTTAAGGTTATTTTTACCAGACCTGTGCTGGAGTATACTCTAATAGTTCGACAAAACTTTTTTCCTTGGGGGGATGGATTTACCATAAAAATAAAGGACTTTCAGAAAGACTGGGAATCTACCCACCAATGCATAACCTGTGAATTTCTTAACTCTTTATTCATTTACAAAAGTCTAGAATCTTTCCATATCGCTGCTGGCCACACTTAAACCTGTGTTAATTTCTACGTGTGCTTTTAGTATCTGTTCTTTTAAAAATGTTCTGTAAGTCATATTGTCAATTTTACAATCTAGTCTTCCTTCCATGTTTGGTGAAATCTCACTGAACAGGAATAATAGCAATAGCTAACAACATCTGCACAGCACCTTACAGTTTGCAAAGAACGTTCACATATTCTTGTCTGAGTGAACATGTTACAGAGATGTCCCTTGATGTCAATGCTAAGTGTTAGAATTTTCAGTCACAGTGTTACTGGCCTTGTTGTGGCACTGATTAGCATACTGATGGGGGTGGGGGTGGGGTGGGAGTGCCAATGTGCTGTCTGTGAAGCTTGTATCATCACAATGGGGCCTGGATGTCTTAGCCACTTGCATCAGACTGACTTGTTAAGTGATGCTTTTCTAGTCTACCTGAATGGGTTTTGTATTTAGCATATTATGGCCTGTAATTTTATTAATTTACCATTTGTTGTCATTAAAAAGTGTCTGTAATGCTA
